# Supplementary material for: RSR-2, the Caenorhabditis elegans Ortholog of Human Spliceosomal Component SRm300/SRRM2, Regulates Development by Influencing the Transcriptional Machinery
Source: PLoS Genet. 2013 Jun 6;9(6):e1003543. doi: 10.1371/journal.pgen.1003543 (PMC3675011; doi:10.1371/journal.pgen.1003543)
Supplement: Table S4 — Mass spectrometry analysis of RSR-2-containing complexes. (XLSX) [file pgen.1003543.s014.xlsx]

## Sheet: proteins coIPed with RSR-2
						_	Igg_1	Igg_2	RSr2_1	RSr2_2	Igg_1				Igg_2				RSr2_1				RSr2_2
Accession	Description	ΣCoverage	Σ# Proteins	Σ# Unique Peptides	Σ# Peptides	Σ# PSMs	A2: Area	B2: Area	C2: Area	D2: Area	Score A4	Coverage A4	# Peptides A4	# PSM A4	Score B4	Coverage B4	# Peptides B4	# PSM B4	Score C4	Coverage C4	# Peptides C4	# PSM C4	Score D4	Coverage D4	# Peptides D4	# PSM D4	# AAs	MW [kDa]	calc. pI
P53014	Myosin, essential light chain OS=Caenorhabditis elegans GN=mlc-3 PE=1 SV=1 - [MLE_CAEEL]	85.62	1	21	21	47	2.32698e+08	1.95733e+08	0	0	965.52	81.05	19	27	665.53	79.74	13	20									153	17.1337	4.70361
P19625	Myosin regulatory light chain 1 OS=Caenorhabditis elegans GN=mlc-1 PE=2 SV=1 - [MLR1_CAEEL]	74.71	1	2	11	36	1.50733e+08	1.39088e+08	0	0	539.54	74.71	11	18	706.34	62.94	8	18									170	18.6054	5.21143
P19626	Myosin regulatory light chain 2 OS=Caenorhabditis elegans GN=mlc-2 PE=1 SV=1 - [MLR2_CAEEL]	74.71	1	2	11	39	1.50733e+08	1.39088e+08	0	0	728.39	74.71	11	20	744.04	63.53	9	19									170	18.5914	5.21143
P10983	Actin-1/3 OS=Caenorhabditis elegans GN=act-1 PE=1 SV=2 - [ACT1_CAEEL]	66.22	1	1	20	61	6.0037e+08	3.83702e+08	0	1.19931e+07	1521.75	65.96	19	38	720.65	47.07	11	21					32.1037	4.79	1	2	376	41.7687	5.47803
P10986	Actin-4 OS=Caenorhabditis elegans GN=act-4 PE=2 SV=2 - [ACT4_CAEEL]	66.22	2	1	20	60	6.0037e+08	3.83702e+08	0	1.19931e+07	1559.07	65.96	19	38	667.73	47.07	11	20					32.1037	4.79	1	2	376	41.7508	5.47803
Q22866	Tropomyosin isoforms a/b/d/f OS=Caenorhabditis elegans GN=lev-11 PE=1 SV=1 - [TPM1_CAEEL]	66.2	4	17	23	52	1.25401e+08	8.99339e+07	0	0	1039.01	60.56	22	29	961.04	59.51	16	23									284	32.9837	4.69092
P02566	Myosin-4 OS=Caenorhabditis elegans GN=unc-54 PE=4 SV=1 - [MYO4_CAEEL]	61.6	1	122	142	557	4.01852e+08	3.76543e+08	0	1.3618e+06	11596.5	60.89	138	297	10465.6	55.24	116	256					89.2741	2.85	4	4	1966	224.988	5.77002
Q20363	Stress-induced protein 1 OS=Caenorhabditis elegans GN=sip-1 PE=1 SV=1 - [SIP1_CAEEL]	59.12	1	7	7	17	0	164311	9.97031e+06	1.66144e+07					23.34	15.09	1	1	222.926	59.12	7	10	116.839	41.51	4	6	159	17.8279	8.08936
Q27249	Tropomyosin isoforms c/e OS=Caenorhabditis elegans GN=lev-11 PE=1 SV=1 - [TPM3_CAEEL]	42.58	2	6	12	19	7.19432e+07	4.80451e+07	0	0	509.21	42.58	12	13	245.65	26.17	6	6									256	29.6141	4.75439
Q19289-2	Isoform b of Intermediate filament protein ifb-1 OS=Caenorhabditis elegans GN=ifb-1 - [IFB1_CAEEL]	37.63	2	17	18	36	4.10536e+07	5.44441e+07	0	0	587.63	28.67	14	18	821.14	25.81	11	18									558	63.6614	5.69385
P37806-2	Isoform b of Protein unc-87 OS=Caenorhabditis elegans GN=unc-87 - [UNC87_CAEEL]	37.43	3	8	8	18	1.63538e+07	1.68849e+07	0	0	305.49	31.55	7	9	287.72	35.03	7	9									374	41.5502	8.11865
P34431	Retrotransposon-like protein 1 OS=Caenorhabditis elegans GN=retr-1 PE=2 SV=5 - [RETR1_CAEEL]	34.24	1	14	14	32	0	0	1.06683e+07	3.90373e+07									475.34	21.47	11	14	550.095	26.5	10	18	517	60.1747	6.26514
P12844	Myosin-3 OS=Caenorhabditis elegans GN=myo-3 PE=2 SV=1 - [MYO3_CAEEL]	33.06	1	47	52	92	1.72921e+08	1.16831e+08	0	0	1870.8	24.73	39	46	1900.28	25.5	37	46									1969	225.371	5.65576
P90900	Intermediate filament protein ifa-4 OS=Caenorhabditis elegans GN=ifa-4 PE=1 SV=2 - [IFA4_CAEEL]	32.24	1	15	16	30	2.60742e+07	3.21935e+07	0	0	521.48	23.57	12	15	653.73	27.21	13	15									577	66.5929	6.65381
P02567	Myosin-1 OS=Caenorhabditis elegans GN=let-75 PE=2 SV=3 - [MYO1_CAEEL]	31.48	1	40	52	122	1.51177e+08	5.22496e+07	0	0	2596.38	30.6	49	78	1601.9	21.36	32	44									1938	223.185	6.07471
P12845	Myosin-2 OS=Caenorhabditis elegans GN=myo-2 PE=2 SV=2 - [MYO2_CAEEL]	29.84	1	42	51	127	2.11808e+08	1.81004e+08	0	0	3088.16	29.84	51	81	2016.63	19.77	31	46									1947	222.911	6.34131
Q10013	Probable small nuclear ribonucleoprotein Sm D1 OS=Caenorhabditis elegans GN=snr-3 PE=2 SV=1 - [SMD1_CAEEL]	26.19	1	2	2	5	0	0	1.31932e+06	1.67786e+06									31.95	10.32	1	1	230.338	15.87	1	4	126	13.6164	11.7222
P18334	Casein kinase II subunit alpha OS=Caenorhabditis elegans GN=kin-3 PE=1 SV=1 - [CSK2A_CAEEL]	23.33	1	9	9	15	0	0	2.8618e+06	2.77294e+06									417.28	23.33	9	14	32.68	3.89	1	1	360	42.2304	6.93213
Q10051	Pre-mRNA-processing factor 19 homolog OS=Caenorhabditis elegans GN=T10F2.4 PE=2 SV=2 - [PRP19_CAEEL]	22.76	2	8	8	17	0	0	5.47813e+06	7.37829e+06									188.538	16.06	6	10	227.345	13.01	4	7	492	53.1752	6.06201
O01504	60S acidic ribosomal protein P2 OS=Caenorhabditis elegans GN=rpa-2 PE=2 SV=2 - [RLA2_CAEEL]	21.5	1	1	1	1	0	0	0	1.02317e+06													71.76	21.5	1	1	107	10.8064	4.67822
P34334	60S ribosomal protein L21 OS=Caenorhabditis elegans GN=rpl-21 PE=1 SV=3 - [RL21_CAEEL]	20.5	1	2	2	4	0	0	596468	2.29255e+06									25.39	11.8	1	1	54.0585	20.5	2	3	161	18.2989	11.1509
P0CG71	Polyubiquitin-A OS=Caenorhabditis elegans GN=ubq-1 PE=3 SV=1 - [UBIQ1_CAEEL]	19.69	3	2	2	2	0	0	1.36921e+06	0									26.4271	19.69	2	2					838	93.9297	7.38623
Q09510	Probable myosin regulatory light chain OS=Caenorhabditis elegans GN=mlc-4 PE=2 SV=1 - [MLRH_CAEEL]	18.6	1	3	3	3	5.05219e+06	0	0	0	143.68	18.6	3	3													172	19.9276	4.729
P51404	40S ribosomal protein S13 OS=Caenorhabditis elegans GN=rps-13 PE=2 SV=2 - [RS13_CAEEL]	16.56	1	2	2	5	0	0	1.08203e+07	3.74527e+07									122.567	16.56	2	3	125.836	7.95	1	2	151	17.3055	10.7114
P34662	60S ribosomal protein L35 OS=Caenorhabditis elegans GN=rpl-35 PE=2 SV=1 - [RL35_CAEEL]	16.26	1	2	2	2	0	0	631724	1.40913e+06									21.72	8.13	1	1	25.47	8.13	1	1	123	14.1862	11.2681
P90901-4	Isoform d of Intermediate filament protein ifa-1 OS=Caenorhabditis elegans GN=ifa-1 - [IFA1_CAEEL]	16.23	4	6	7	9	7.1449e+06	5.19555e+06	0	0	115.48	5.64	3	3	288.72	12.35	5	6									567	65.4986	6.53662
Q9TXP0	40S ribosomal protein S27 OS=Caenorhabditis elegans GN=rps-27 PE=1 SV=3 - [RS27_CAEEL]	15.66	1	1	1	2	0	0	4.05367e+06	1.80612e+07									34.24	15.66	1	1	46.33	15.66	1	1	83	9.34078	9.20264
Q9XTU6	Probable small nuclear ribonucleoprotein E OS=Caenorhabditis elegans GN=snr-6 PE=2 SV=1 - [RUXE_CAEEL]	15.56	1	1	1	2	0	0	1.0195e+06	3.65509e+06									28.1	15.56	1	1	52.19	15.56	1	1	90	10.6036	9.12939
Q9BLB6	Probable U2 small nuclear ribonucleoprotein A' OS=Caenorhabditis elegans GN=sap-1 PE=1 SV=1 - [RU2A_CAEEL]	14.62	1	2	2	2	0	0	1.26346e+06	0									78.3562	14.62	2	2					253	28.8468	7.92822
Q17348	Small nuclear ribonucleoprotein Sm D3 OS=Caenorhabditis elegans GN=snr-1 PE=2 SV=2 - [SMD3_CAEEL]	13.97	1	2	2	3	0	0	1.08632e+06	4.97406e+06									25.67	7.35	1	1	58.1008	13.97	2	2	136	14.8026	10.814
P91303	Probable V-type proton ATPase subunit G OS=Caenorhabditis elegans GN=vha-10 PE=2 SV=1 - [VATG_CAEEL]	12.7	1	1	1	1	0	0	373745	0									20.62	12.7	1	1					126	14.4767	9.59814
Q09936	Uncharacterized protein C53C9.2 OS=Caenorhabditis elegans GN=C53C9.2 PE=2 SV=2 - [YSE2_CAEEL]	11.08	1	3	3	3	4.183e+06	2.37212e+06	0	0	28.44	6.3	2	2	21.4	4.79	1	1									397	44.7887	4.65283
Q965X6	E3 ubiquitin-protein ligase siah-1 OS=Caenorhabditis elegans GN=siah-1 PE=1 SV=3 - [SIAH1_CAEEL]	10.5	1	4	4	6	0	0	1.20373e+06	1.15917e+06									73.4862	5.01	2	2	140.108	8.59	3	4	419	45.774	5.74463
Q22836	Uncharacterized protein T27F2.1 OS=Caenorhabditis elegans GN=T27F2.1 PE=1 SV=1 - [YGH1_CAEEL]	9.72	1	3	3	3	0	0	940685	6.21911e+06									67.18	1.87	1	1	81.8878	7.85	2	2	535	60.1605	8.90967
O45946	60S ribosomal protein L18 OS=Caenorhabditis elegans GN=rpl-18 PE=3 SV=1 - [RL18_CAEEL]	9.57	1	1	1	1	0	0	0	1.14835e+06													28.73	9.57	1	1	188	20.9836	11.3999
P53013	Elongation factor 1-alpha OS=Caenorhabditis elegans GN=eft-3 PE=2 SV=1 - [EF1A_CAEEL]	9.29	1	4	4	4	0	0	1.96773e+06	2.54833e+06									71.75	2.38	1	1	92.4557	6.91	3	3	463	50.6363	8.93896
P10567	Paramyosin OS=Caenorhabditis elegans GN=unc-15 PE=1 SV=1 - [MYSP_CAEEL]	8.16	1	6	6	6	9.12669e+06	0	0	0	170.68	8.16	6	6													882	101.888	5.37646
P34540	Kinesin heavy chain OS=Caenorhabditis elegans GN=unc-116 PE=2 SV=2 - [KINH_CAEEL]	7.85	1	4	4	7	0	0	0	2.89567e+06													271.944	7.85	4	7	815	91.8371	6.40479
Q19877	40S ribosomal protein S23 OS=Caenorhabditis elegans GN=rps-23 PE=2 SV=1 - [RS23_CAEEL]	7.69	1	1	1	1	0	0	906249	0									35.1	7.69	1	1					143	15.8647	10.4771
O45499	40S ribosomal protein S26 OS=Caenorhabditis elegans GN=rps-26 PE=2 SV=1 - [RS26_CAEEL]	7.69	1	1	1	1	0	0	1.08406e+06	0									20.36	7.69	1	1					117	13.241	11.1069
P09588	Histone H2A OS=Caenorhabditis elegans GN=his-3 PE=1 SV=2 - [H2A_CAEEL]	7.09	3	1	1	1	0	0	942505	0									42.89	7.09	1	1					127	13.3965	10.6968
P34369	Pre-mRNA-splicing factor 8 homolog OS=Caenorhabditis elegans GN=prp-8 PE=1 SV=1 - [PRP8_CAEEL]	6.96	1	13	13	19	0	0	1.36317e+06	2.97062e+06									391.865	5.93	12	14	135.595	1.98	2	5	2329	271.855	8.82178
O62327	Probable glutathione peroxidase R05H10.5 OS=Caenorhabditis elegans GN=R05H10.5 PE=2 SV=1 - [GPX2_CAEEL]	6.75	1	1	1	1	7.25772e+07	0	0	0	25.71	6.75	1	1													163	18.1403	7.23975
P46822-3	Isoform 3 of Kinesin light chain OS=Caenorhabditis elegans GN=klc-2 - [KLC_CAEEL]	6.59	4	3	3	3	0	0	0	3.20147e+06													96.8826	6.59	3	3	501	56.4294	5.73193
P34546	V-type proton ATPase 16 kDa proteolipid subunit 2/3 OS=Caenorhabditis elegans GN=vha-2 PE=2 SV=2 - [VATL2_CAEEL]	5.59	1	1	1	1	5.59606e+06	0	0	0	57.34	5.59	1	1													161	16.3986	8.27979
Q9N4I4	60S ribosomal protein L10a OS=Caenorhabditis elegans GN=rpl-10a PE=2 SV=1 - [RL10A_CAEEL]	5.56	1	1	1	1	0	0	0	1.9854e+06													60.24	5.56	1	1	216	24.1221	9.92041
Q9BL19	60S ribosomal protein L17 OS=Caenorhabditis elegans GN=rpl-17 PE=2 SV=1 - [RL17_CAEEL]	5.35	1	1	1	2	0	0	271930	1.37175e+06									31.3	5.35	1	1	39.33	5.35	1	1	187	21.4993	10.3013
Q09533	60S ribosomal protein L10 OS=Caenorhabditis elegans GN=rpl-10 PE=2 SV=1 - [RL10_CAEEL]	5.14	1	1	1	1	0	0	0	732190													62.06	5.14	1	1	214	24.7328	10.3452
P91918	Probable small nuclear ribonucleoprotein-associated protein B OS=Caenorhabditis elegans GN=snr-2 PE=2 SV=1 - [RSMB_CAEEL]	5	1	1	1	1	0	0	1.53065e+06	0									62.74	5	1	1					160	16.7305	9.99365
Q19286-2	Isoform c of Intermediate filament protein ifb-2 OS=Caenorhabditis elegans GN=ifb-2 - [IFB2_CAEEL]	4.75	2	1	2	2	0	7.42124e+06	0	0					35.92	4.75	2	2									526	59.7355	5.57959
Q09457	Cuticle collagen bli-1 OS=Caenorhabditis elegans GN=bli-1 PE=2 SV=2 - [BLI1_CAEEL]	4.75	1	3	3	4	0	0	0	1.62378e+06													91.3806	4.75	3	4	948	105.3	6.52197
P28548	Casein kinase II subunit beta OS=Caenorhabditis elegans GN=kin-10 PE=1 SV=2 - [CSK2B_CAEEL]	4.7	2	1	1	2	0	0	1.01512e+06	1.20765e+06									32.59	4.7	1	1	36.5	4.7	1	1	234	26.4186	5.16064
Q966C6-2	Isoform c of 60S ribosomal protein L7a OS=Caenorhabditis elegans GN=rpl-7A - [RL7A_CAEEL]	4.49	2	1	1	3	0	0	0	3.68891e+06													141.795	4.49	1	3	245	27.9216	10.7261
O02056	60S ribosomal protein L4 OS=Caenorhabditis elegans GN=rpl-4 PE=1 SV=3 - [RL4_CAEEL]	4.35	1	1	1	1	0	0	0	0									71.1	4.35	1	1					345	38.6352	11.2241
Q9XVF7	60S ribosomal protein L8 OS=Caenorhabditis elegans GN=rpl-8 PE=1 SV=1 - [RL8_CAEEL]	4.23	1	1	1	2	0	0	753108	2.03388e+06									48.6	4.23	1	1	45.77	4.23	1	1	260	28.1863	11.063
P09446	Heat shock 70 kDa protein A OS=Caenorhabditis elegans GN=hsp-1 PE=1 SV=2 - [HSP7A_CAEEL]	3.91	3	2	2	3	0	0	1.52409e+06	5.57942e+06									89.0485	3.91	2	2	60.76	2.03	1	1	640	69.6796	5.64307
Q21902	DNA replication licensing factor mcm-5 OS=Caenorhabditis elegans GN=mcm-5 PE=2 SV=1 - [MCM5_CAEEL]	3.69	1	2	2	3	0	0	1.29215e+06	1.42613e+06									35.67	1.98	1	1	47.1295	3.69	2	2	759	84.8821	8.80713
Q22053	rRNA 2'-O-methyltransferase fibrillarin OS=Caenorhabditis elegans GN=fib-1 PE=2 SV=1 - [FBRL_CAEEL]	3.69	1	1	1	1	0	0	0	3.48979e+06													34.21	3.69	1	1	352	36.3607	10.2573
Q22957	UPF0376 protein F10G2.1 OS=Caenorhabditis elegans GN=F10G2.1 PE=1 SV=2 - [U376C_CAEEL]	3.48	1	1	1	1	3.10309e+06	0	0	0	21.7	3.48	1	1													201	22.9741	5.08447
Q9N3X2	40S ribosomal protein S4 OS=Caenorhabditis elegans GN=rps-4 PE=1 SV=1 - [RS4_CAEEL]	3.47	1	1	1	1	0	0	749487	0									37.31	3.47	1	1					259	29.0258	10.4624
P50880	60S ribosomal protein L3 OS=Caenorhabditis elegans GN=rpl-3 PE=2 SV=1 - [RL3_CAEEL]	3.24	1	1	1	1	0	0	407304	0									22.14	3.24	1	1					401	45.6306	10.4038
O17580	Nucleolar complex protein 2 homolog OS=Caenorhabditis elegans GN=pro-2 PE=2 SV=2 - [NOC2L_CAEEL]	2.66	1	1	1	1	0	0	475481	0									55.59	2.66	1	1					715	81.9421	6.7124
Q17336	Pre-mRNA-splicing factor CWC22 homolog OS=Caenorhabditis elegans GN=let-858 PE=2 SV=1 - [CWC22_CAEEL]	2.56	1	2	2	3	0	0	924882	290642									50.23	1	1	1	91.5327	1.56	1	2	897	104.205	6.771
Q21067-2	Isoform b of Intermediate filament protein ifc-2 OS=Caenorhabditis elegans GN=ifc-2 - [IFC2_CAEEL]	1.99	2	1	1	1	975519	0	0	0	43.03	1.99	1	1													502	56.1736	6.84424
Q9XXK1-3	Isoform c of ATP synthase subunit alpha, mitochondrial OS=Caenorhabditis elegans GN=H28O16.1 - [ATPA_CAEEL]	1.99	3	1	1	1	0	0	415393	0									49.16	1.99	1	1					503	54.1206	9.05615
P49595	Probable protein phosphatase 2C F42G9.1 OS=Caenorhabditis elegans GN=F42G9.1 PE=2 SV=2 - [PP2C1_CAEEL]	1.83	1	1	1	1	0	0	272840	0									24.58	1.83	1	1					491	53.1087	4.34814
Q09363	Probable glucuronosyltransferase sqv-8 OS=Caenorhabditis elegans GN=sqv-8 PE=1 SV=1 - [SQV8_CAEEL]	1.69	1	1	1	1	2.1869e+07	0	0	0	20.3	1.69	1	1													356	41.0634	8.96826
P34272	Uncharacterized transporter C02C2.4 OS=Caenorhabditis elegans GN=C02C2.4 PE=2 SV=2 - [YKH4_CAEEL]	1.68	1	1	1	1	2.1857e+06	0	0	0	22.92	1.68	1	1													535	59.2112	7.44482
P34600	WW domain-containing protein ZK1098.1 OS=Caenorhabditis elegans GN=ZK1098.1 PE=4 SV=2 - [YO61_CAEEL]	1.52	1	1	1	1	0	0	703708	0									45.51	1.52	1	1					724	84.6124	9.0708
P34712	Multidrug resistance protein pgp-1 OS=Caenorhabditis elegans GN=pgp-1 PE=2 SV=2 - [PGP1_CAEEL]	0.68	1	1	1	1	1.80584e+07	0	0	0	24.5	0.68	1	1													1321	144.971	7.85498
Q23541	Lysine-specific demethylase rbr-2 OS=Caenorhabditis elegans GN=rbr-2 PE=1 SV=2 - [KDM5_CAEEL]	0.61	1	1	1	1	0	0	0	3.68438e+07													30.78	0.61	1	1	1477	170.682	6.52197

## Sheet: classification RSR-2interactors
Accession	Description	ΣCoverage	α-RSR-2 IP1 (#peptides)	α-RSR-2 IP2 (#peptides)
RNA metabolism
P34369	Pre-mRNA-splicing factor 8 homolog OS=Caenorhabditis elegans GN=prp-8 PE=1 SV=1 - [PRP8_CAEEL]	6.96	12	2
Q9BLB6	Probable U2 small nuclear ribonucleoprotein A' OS=Caenorhabditis elegans GN=mog-2 PE=1 SV=1 - [RU2A_CAEEL]	14.62	2
Q10013	Probable small nuclear ribonucleoprotein Sm D1 OS=Caenorhabditis elegans GN=snr-3 PE=2 SV=1 - [SMD1_CAEEL]	26.19	1	1
Q9XTU6	Probable small nuclear ribonucleoprotein E OS=Caenorhabditis elegans GN=snr-6 PE=2 SV=1 - [RUXE_CAEEL]	15.56	1	1
Q17348	Small nuclear ribonucleoprotein Sm D3 OS=Caenorhabditis elegans GN=snr-1 PE=2 SV=2 - [SMD3_CAEEL]	13.97	1	2
Q17336	Pre-mRNA-splicing factor CWC22 homolog OS=Caenorhabditis elegans GN=let-858 PE=2 SV=1 - [CWC22_CAEEL]	2.56	1	1
P91918	Probable small nuclear ribonucleoprotein-associated protein B OS=Caenorhabditis elegans GN=snr-2 PE=2 SV=1 - [RSMB_CAEEL]	5	1
Q22053	rRNA 2'-O-methyltransferase fibrillarin OS=Caenorhabditis elegans GN=fib-1 PE=2 SV=1 - [FBRL_CAEEL]	3.69		1
O17580	Nucleolar complex protein 2 homolog OS=Caenorhabditis elegans GN=pro-2 PE=2 SV=2 - [NOC2L_CAEEL]	2.66	1
RNA metabolism and transcription
Q10051	Pre-mRNA-processing factor 19 homolog OS=Caenorhabditis elegans GN=T10F2.4 PE=2 SV=2 - [PRP19_CAEEL]	22.76	6	4
Q22836	Uncharacterized protein T27F2.1 OS=Caenorhabditis elegans GN=skp-1 PE=1 SV=1 - [YGH1_CAEEL]	9.72	1	2
P18334	Casein kinase II subunit alpha OS=Caenorhabditis elegans GN=kin-3 PE=1 SV=1 - [CSK2A_CAEEL]	23.33	9	1
Stress response
Q20363	Stress-induced protein 1 OS=Caenorhabditis elegans GN=sip-1 PE=1 SV=1 - [SIP1_CAEEL]	59.12	7	4
P09446	Heat shock 70 kDa protein A OS=Caenorhabditis elegans GN=hsp-1 PE=1 SV=2 - [HSP7A_CAEEL]	3.91	2	1
Ubiquitination
Q965X6	E3 ubiquitin-protein ligase siah-1 OS=Caenorhabditis elegans GN=siah-1 PE=1 SV=3 - [SIAH1_CAEEL]	10.5	2	3
P0CG71	Polyubiquitin-A OS=Caenorhabditis elegans GN=ubq-1 PE=3 SV=1 - [UBIQ1_CAEEL]	19.69	2
Chromatin
Q23541	Lysine-specific demethylase rbr-2 OS=Caenorhabditis elegans GN=rbr-2 PE=1 SV=2 - [KDM5_CAEEL]	0.61		1
P09588	Histone H2A OS=Caenorhabditis elegans GN=his-3 PE=1 SV=2 - [H2A_CAEEL]	7.09	1
Translation Related
P53013	Elongation factor 1-alpha OS=Caenorhabditis elegans GN=eft-3 PE=2 SV=1 - [EF1A_CAEEL]	9.29	1	3
O01504	60S acidic ribosomal protein P2 OS=Caenorhabditis elegans GN=rpa-2 PE=2 SV=2 - [RLA2_CAEEL]	21.5		1
P34334	60S ribosomal protein L21 OS=Caenorhabditis elegans GN=rpl-21 PE=1 SV=3 - [RL21_CAEEL]	20.5	1	2
P51404	40S ribosomal protein S13 OS=Caenorhabditis elegans GN=rps-13 PE=2 SV=2 - [RS13_CAEEL]	16.56	2	1
P34662	60S ribosomal protein L35 OS=Caenorhabditis elegans GN=rpl-35 PE=2 SV=1 - [RL35_CAEEL]	16.26	1	1
Q9TXP0	40S ribosomal protein S27 OS=Caenorhabditis elegans GN=rps-27 PE=1 SV=3 - [RS27_CAEEL]	15.66	1	1
O45946	60S ribosomal protein L18 OS=Caenorhabditis elegans GN=rpl-18 PE=3 SV=1 - [RL18_CAEEL]	9.57		1
Q19877	40S ribosomal protein S23 OS=Caenorhabditis elegans GN=rps-23 PE=2 SV=1 - [RS23_CAEEL]	7.69	1
O45499	40S ribosomal protein S26 OS=Caenorhabditis elegans GN=rps-26 PE=2 SV=1 - [RS26_CAEEL]	7.69	1
Q9N4I4	60S ribosomal protein L10a OS=Caenorhabditis elegans GN=rpl-10a PE=2 SV=1 - [RL10A_CAEEL]	5.56		1
Q9BL19	60S ribosomal protein L17 OS=Caenorhabditis elegans GN=rpl-17 PE=2 SV=1 - [RL17_CAEEL]	5.35	1	1
Q09533	60S ribosomal protein L10 OS=Caenorhabditis elegans GN=rpl-10 PE=2 SV=1 - [RL10_CAEEL]	5.14		1
Q966C6-2	Isoform c of 60S ribosomal protein L7a OS=Caenorhabditis elegans GN=rpl-7A - [RL7A_CAEEL]	4.49		1
Q9XVF7	60S ribosomal protein L8 OS=Caenorhabditis elegans GN=rpl-8 PE=1 SV=1 - [RL8_CAEEL]	4.23	1	1
Q9N3X2	40S ribosomal protein S4 OS=Caenorhabditis elegans GN=rps-4 PE=1 SV=1 - [RS4_CAEEL]	3.47	1
P50880	60S ribosomal protein L3 OS=Caenorhabditis elegans GN=rpl-3 PE=2 SV=1 - [RL3_CAEEL]	3.24	1
Others
P34431	Retrotransposon-like protein 1 OS=Caenorhabditis elegans GN=retr-1 PE=2 SV=5 - [RETR1_CAEEL]	34.24	11	10
P91303	Probable V-type proton ATPase subunit G OS=Caenorhabditis elegans GN=vha-10 PE=2 SV=1 - [VATG_CAEEL]	12.7	1
P34540	Kinesin heavy chain OS=Caenorhabditis elegans GN=unc-116 PE=2 SV=2 - [KINH_CAEEL]	7.85		4
P46822-3	Isoform 3 of Kinesin light chain OS=Caenorhabditis elegans GN=klc-2 - [KLC_CAEEL]	6.59		3
Q09457	Cuticle collagen bli-1 OS=Caenorhabditis elegans GN=bli-1 PE=2 SV=2 - [BLI1_CAEEL]	4.75		3
P28548	Casein kinase II subunit beta OS=Caenorhabditis elegans GN=kin-10 PE=1 SV=2 - [CSK2B_CAEEL]	4.7	1	1
Q21902	DNA replication licensing factor mcm-5 OS=Caenorhabditis elegans GN=mcm-5 PE=2 SV=1 - [MCM5_CAEEL]	3.69	1	2
Q9XXK1-3	Isoform c of ATP synthase subunit alpha, mitochondrial OS=Caenorhabditis elegans GN=H28O16.1 - [ATPA_CAEEL]	1.99	1
P49595	Probable protein phosphatase 2C F42G9.1 OS=Caenorhabditis elegans GN=F42G9.1 PE=2 SV=2 - [PP2C1_CAEEL]	1.83	1
P34600	WW domain-containing protein ZK1098.1 OS=Caenorhabditis elegans GN=ZK1098.1 PE=4 SV=2 - [YO61_CAEEL]	1.52	1
